# Supplementary material
Source: Springer Nature journal article supplement (https://www.springermedizin.de/resource/supplementary/13722_2013_239_MOESM1_ESM.pdf/9675360)
Supplement: MOESM1 [file 9675360]

Screened for eligibility (n=18,511)

Excluded (n=17,811)

- ◆ Not meeting inclusion criteria (n=17,523)
- ◆ Declined to participate (n=94)
- ◆ Other reasons (n=194)

Randomized (n=700)

Allocated to *Life Shift* SBIRT intervention (n=346)

- ◆ Received allocated intervention (n=346)

Allocated to *Shift Gears* control intervention (n=354)

- ◆ Received allocated intervention (n=354)

Lost to follow-up (n=196)

- ◆ Could not be contacted (n=155)
- ◆ No show for follow-up visit (n=14)
- ◆ Refused (n=13)
- ◆ In drug rehabilitation (n=8)
- ◆ Incarcerated (n=3)
- ◆ Deceased/severely ill (n=3)

Analyzed (n=150)

Lost to follow-up (n=210)

- ◆ Could not be contacted (n=163)
- ◆ No show for follow-up visit (n=18)
- ◆ Refused (n=9)
- ◆ In drug rehabilitation (n=13)
- ◆ Incarcerated (n=3)
- ◆ Deceased/severely ill (n=4)

Analyzed (n=144)
